# Supplementary material for: Does Antihypertensive Drug Class Affect Day‐to‐Day Variability of Self‐Measured Home Blood Pressure? The HOMED‐BP Study
Source: PubMed Central journal article supplement — J Am Heart Assoc. 2016 Mar 23;5(3):e002995. doi: 10.1161/JAHA.115.002995 (PMC4943272; doi:10.1161/jaha.115.002995), 2016-03-23
Supplement: JAH3-5-e002995-s001.pdf [file JAH3-5-e002995-s001.pdf]

# SUPPLEMENTAL MATERIAL

## Appendix

### HOMED-BP Study Investigators

#### Coordination and management

**Principal investigator:** Y. Imai.

**Advisory committee:** K. Arakawa, M. Fujishima (deceased), J. Fujii, K. Fukiyama, S. Hisamichi, O. Iimura, M. Ishii, T. Omae, T. Saruta, and K. Yoshinaga.

**Steering committee:** I. Abe, K. Abe, T. Abukawa, T. Ashida, N. Dohba, T. Etoh, A. Fujimura, T. Fujita, A. Fukui, T. Gotoh, H. Hama, T. Hano, H. Hayashi, N. Hayashida, M. Hayashi, K. Hiramori, Y. Hirai, Y. Hirata, K. Hiwada, K. Hora, S. Ichikawa, T. Iida, T. Ikeda, T. Imaizumi, K. Ishikawa, I. Ito, M. Ito, S. Ito, D. Iwaoka, K. Kanamasa, T. Katagiri, S. Katayama, H. Kawamura, Y. Kawano, H. Kida, K. Kikuchi, G. Kimura, K. Kimura, H. Kitaoka, S. Kobayashi, K. Kohara, S. Kojima, I. Komuro, H. Kumagai, Y. Kumagai, E. Kusano, T. Kushiro, I. Kuwajima, Y. Maruyama, F. Masani, H. Matsubara, T. Matsubara, M. Matsumoto, H. Matsuoka, H. Matsuura, Y. Mishima, M. Miura, I. Miyamori, H. Mori, H. Murakami, H. Muratani, M. Nakagawa, K. Nakao, M. Naruse, I. Nishio, T. Ogihara, M. Ohta, K. Ohtsuka, Y. Ohtsuka, Y. Ohuchi, S. Oikawa, M. Okabe, K. Okumura, I. Saitoh, H. Saitoh, T. Sakata, K. Saku, H. Sasaki, M. Seino, S. Senda, K. Shimada, K. Shimamoto, M. Shimizu, T. Shiomi, K. Shirato, M. Sone, H. Suzuki, S. Suzuki, H. Takahashi, M. Takada, K. Takeda, N. Takeda, A. Takeshita, S. Takishita, S. Tanaka, K. Toba, O. Tochikubo, H. Tomoike, Y. Ueno, S. Umemura, H. Urata, T. Watanabe, K. Yamada, T. Yamaguchi, M. Yamakado, Y. Yamamoto, Y. Yamamoto, A. Yamashina, H. Yokoyama, and M. Yoshimura.

**Management committee:** Y. Imai, T. Ohkubo, K. Asayama, H. Satoh, Y. Kondo, K. Totsune, Y. Miura.

**Safety monitoring and information security committee:** H. Satoh, R. Inoue, H. Shishido, Y. Kondo.

**Endpoint committee:** H. Katagiri, K. Miura, A. Fujiyoshi, A. Kadota, N. Takashima, S. Nagasawa, S. Torii, S. Kadowaki, T. Hisamatsu, S. Suzuki, T. Ito, Y. Oka.

**Data management committee:** H. Metoki, S. Saito, K. Hosohata, T. Kato, C. Takahashi, M. Kikuya, L. Thijs, T. Ohkubo.

**Operation center:** K. Asayama, T. Fujiwara, T. Nishimura, Y. Aoki, Y. Fushimi, H. Shishido, A. Kohinata, Y. Kanno, M. Osugi, M. Suzuki, M. Saito, T. Tamura, N. Fukushima, S. Sakuma, S. Katada, K. Sakurai, M. Sato, T. Hirose, A. Satoh, T. Obara.

### **Clinical investigators**

**Hokkaido:** T. Ando, J. Anzai, S. Hosoda, M. Iida, K. Ito, I. Kinbara, M. Koizumi, Y. Masuda, K. Matsumoto, T. Mito, T. Miyamura, H. Morimoto, M. Nakagawa, T. Noto, K. Oda, Y. Ogawa, M. Shiiki, M. Shiraishi, K. Shiraishi, M. Tada, Y. Takagawa, K. Takahashi, S. Tanaka, S. Yonekura.

**Tohoku:** H. Abe, M. Aihara, Y. Amada, Y. Ando, I. Aoyama, I. Aoyama, F. Araki, K. Asayama, S. Egawa, Y. Emura, T. Fujita, K. Fukami, T. Goto, T. Hayakawa, Y. Hayashi, T. Hayashi, T. Hirose, N. Hiwatari, H. Hoshi, N. Imai, Y. Imai, M. Inoue, K. Ishibashi, H. Ishii, Y. Ishi-kawa, M. Ito, H. Ito, T. Ito, K. Ito, K. Ito, M. Iwamoto, H. Jin, M. Kamimoto, A. Kanno, S. Kashima, S. Kataoka, K. Kawamorita, Y. Kawamorita, S. Kibira, K. Kikuchi, K. Kikuchi, M. Kikuya, Y. Kimura, H. Kimura, M. Kimura, M. Kishi, A. Kitabayashi, K. Komai, T. Kondo, K. Kurosawa, S. Kutsuzawa, S. Kyogoku, K. Machii, H. Mashiko, K. Matsuo, H. Metoki, O. Minami, H. Misawa, Y. Miyazaki, R. Mori, H. Morikawa, K. Morita, T. Mouri, S. Nagai, K. Nakamura, D. Nakayama, K. Nihei, K. Ohira, E. Ohtomo, F. Okuguchi, A. Omoto, Y. Ono, Y. Otsuka, K. Saeki, H. Sakuma, S. Sasaki, T. Sato, E. Sato, S. Satoho, J. Seino, H. Seki, M. Sekino, A. Shibasaki, K. Shimada, Y. Shimanaka, Y. Shishido, K. Sone, T. Sugawara, H. Suzuki, H. Suzuki, Y. Suzuki, J. Tajima, Y. Takagi, K. Takahashi, H. Takahashi, Y. Takaya, H. Tanaka, N. Tanno, Y. Tanno, G. Tashima, M. Techigawara, Y. Tominaga, H. Toyama, Y. Tsukahara, H. Unakami, M. Wada, N. Watanabe, T. Watanabe, M. Watanabe, S. Watanabe, H. Watanabe, T. Yabuki, C. Yagi, N. Yamada, Z. Yamada, T. Yamagishi, N. Yamamoto, H. Yamamoto, H. Yamamoto, H. Yokkaichi.

**Kanto:** S. Abe, M. Adachi, N. Akiyama, H. Aoki, M. Arai, T. Arai, S. Arai, T. Cho, S. Dotare, T. Fujito, K. Fukuda, T. Fukutome, H. Funayama, T. Gomi, Y. Hamada, K. Hasegawa, M. Hashida, A. Hashimoto, Y. Hatori, H. Higashi, S. Higashi, N. Hirawa, T. Honzawa, K. Hori, K. Horie, H. Horikoshi, T. Hoshino, K. Ichikawa, K. Ieki, C. Iguchi, T. Ikeda, T. Iketani, M. Inaba, S. Inokuma, Y. Ishimaru, S. Ito, M. Iwasaki, K. Kanouzawa, S. Kanouzawa, M. Kato, H. Kawamura, K. Kimura, Y. Kodama, I. Koga, H. Koide, T. Koitabashi, N. Koshikawa, T. Kudo, Y. Kumagai, F. Kurata, M. Kurosawa, K. Kuwaki, T. Masuda, R. Matsunaga, M. Miyakawa, H. Mori, T. Nagao, C. Nakajima, M. Nakamura, M. Nakano, T. Nakayama, K. Nemoto, H. Nishimura, Y. Noda, S. Noji, K. Noma, T. Noshiro, Y. Nozaki, K. Okamoto, K. Okano, Y. Ooba, E. Osuga, H. Saito, J. Sakurai, T. Sato, H. Sato, T. Sekihara, K. Seta, J. Shimizu, T. Shinozaki, H. Suga, M. Suzuki, R. Takahata, H. Takata, K. Takayama, H. Takigawa, T. Teramoto, S. Tsukagoshi, T. Ueda, T. Umetsu, M. Ushiyama, Y.

Watanabe, N. Yagi, C. Yamada, H. Yamaguchi, M. Yamakado, H. Yamamoto, T. Yamamoto, S. Yamashina, M. Yanagisawa, F. Yasuda, S. Yatagai, H. Yoshimatsu.

**Chu-bu and Hokuriku:** N. Adachi, F. Akaoka, S. Akira, F. Ando, S. Asai, A. Asaji, S. Asato, K. Goto, K. Hayashi, N. Hieda, H. Higashi, K. Hirahara, H. Horie, M. Hoshiai, T. Iida, T. Ise, J. Ishiguro, S. Ishikawa, A. Ito, J. Kamijo, S. Kato, N. Kato, Y. Kawamura, I. Kawamura, H. Kobayashi, N. Kojima, Y. Koyama, M. Kozuka, K. Kuroda, T. Matsu, H. Matsumoto, J. Mihara, H. Mori, T. Morise, A. Naito, T. Nakagawa, S. Nakajima, T. Nakamura, H. Nakayama, H. Nishino, O. Nojiri, T. Ohno, N. Ohya, N. Okanishi, K. Okazaki, S. Oohashi, T. Ookura, T. Saeki, R. Saito, K. Sakakura, K. Satake, M. Senga, K. Sugiura, S. Sugiyama, Y. Suzaki, S. Suzuki, C. Takaeda, S. Takahashi, Y. Takahira, H. Takakuwa, H. Takakuwa, K. Takasawa, M. Takata, N. Takeuchi, N. Takeuchi, H. Tamagaki, Y. Terada, M. Tobe, K. Uchiba, K. Uwatoko, Y. Yamaguchi, Y. Yamamoto, H. Yamamoto, S. Yokoyama.

**Kansai:** M. Amemori, S. Fujita, M. Fujiwara, S. Goto, Y. Hamaguchi, K. Hayashi, N. Hirobe, N. Imai, M. Iwane, T. Kanaya, K. Kanemasa, J. Kasahara, H. Kato, S. Katsuya, H. Kishima, K. Kitayama, M. Koide, K. Komaki, K. Konishi, Y. Kurimoto (deceased), T. Majima, A. Masui, M. Nagai, H. Nagai, K. Nagao, K. Nakamura, K. Nakamuta, S. Nishi, A. Nogami, S. Ono, T. Orito, N. Sakamoto, I. Sano, S. Sawada, H. Sawaoka, H. Shimakoshi, Y. Shimakoshi, K. Shirai, H. Suzuki, N. Suzuki, N. Takahashi, N. Takeda, Y. Takeda, Y. Takemoto, T. Takenaka, K. Tamai, Y. Terayama, M. Ueda, T. Ueda, I. Watanabe, T. Yamaguchi, O. Yamaoka, K. Yasui, S. Yo, K. Yoshida, H. Yoshikawa.

**Chu-goku:** T. Furue, Y. Furukawa, M. Gen, M. Harada, K. Iwasaki, M. Kahara, M. Kamura, K. Kida, J. Minami, K. Mizuno, K. Murata, Y. Nakamura, K. Nakayasu, C. Ogurusu, A. Ohtahara, M. Osakata, S. Sasaki, N. Sasaki, H. Sugiura, S. Tenou, A. Tokunaga, Y. Tominaga (deceased), T. Yoshimoto.

**Shikoku:** M. Arizumi, K. Fujino, T. Fukui, S. Furumoto, W. Furumoto, T. Inoue, R. Kawamoto, M. Kimura, Y. Kitami, A. Kobaru, F. Kouno, C. Matsumoto, T. Matsuno, S. Mizobuchi, H. Mizobuchi, S. Nishiyama, T. Okabe, T. Okura, A. Ota, M. Takeuchi, S. Ueta, H. Yamamoto, T. Yokoi, K. Yoshida.

**Kyushu and Okinawa:** K. Abe, S. Arima, T. Asato, T. Aso, T. Endo, Y. Endo, T. Fujino, Y. Fujishima, K. Funatsu, S. Hamasaki, O. Hano, Y. Hirooka, C. Hirota, T. Homma, Y. Inobe, J. Inoue, T. Iwaoka, H. kamiya, Y. Karimata, Y. Kimura, K. Kitano, H. Koga, M. Kouno, A. Kuwahara, Y. Masuda, J. Miyagi, Y. Miyazaki, Y. Muta, M. Nagata, N. Nagayoshi, H. Nakamura, Y. Nakamura, H. Nakano, S. Naomi, K. Ninomiya, F. Omori, T. Ono, K. Onoyama, W. Oobayashi, K. Oshima, H. Ozaki, K. Sasaki, R. Shindo, M. Shiraki, R. Sunagawa, S. Suzuki, Y. Takagi, K.

Takano, K. Takashiba, Y. Takeshita, M. Tohaya, K. Tohyama, H. Tomori, H. Urata, N. Wake, S. Yamada, H. Yoshii.
